# Supplementary material for: Development and characterization of a novel l-asparaginase/MWCNT nanobioconjugate
Source: Royal Society of Chemistry journal article supplement (doi:10.1039/d0ra05534d), 2020-01-01
Supplement: d0ra05534d1.pdf [file d0ra05534d1.pdf]

## **Electronic Supplementary Information**

### **Development and characterization of a novel L-asparaginase/MWCNT nanobioconjugate**

Raquel O. Cristóvão<sup>1</sup>, Mafalda R. Almeida<sup>2</sup>, Maria A. Barros<sup>1</sup>, João C.F. Nunes<sup>2</sup>, Rui A.R. Boaventura<sup>1</sup>, José M. Loureiro<sup>1</sup>, Joaquim L. Faria<sup>1</sup>, Márcia C. Neves<sup>2</sup>, Mara G. Freire<sup>2</sup>, Valéria C. Ebinuma-Santos<sup>3</sup>, Ana P.M. Tavares<sup>2,\*</sup>, Cláudia G. Silva<sup>1,\*</sup>

<sup>1</sup>*Laboratory of Separation and Reaction Engineering - Laboratory of Catalysis and Materials (LSRE-LCM), Department of Chemical Engineering, Faculty of Engineering, University of Porto, Rua do Dr. Roberto Frias, 4200-465, Porto, Portugal*

<sup>2</sup>*CICECO-Aveiro Institute of Materials, Department of Chemistry, University of Aveiro, 3810-193 Aveiro, Portugal*

<sup>3</sup>*Department of Engineering Bioprocess and Biotechnology, School of Pharmaceutical Sciences, UNESP-University Estadual Paulista, Araraquara, Brazil*

\*Corresponding authors:

Ana P. M. Tavares:

*Tel: +351 234 401 520; e-mail: aptavares@ua.pt*

Cláudia G. Silva:

*Tel: +351 220 414 874; e-mail: cgsilva@fe.up.pt*

**Table S1.** Effect of pH on immobilization yield and relative recovered activity obtained with the immobilization of  $8.6 \times 10^{-5}$  g.mL<sup>-1</sup> of ASNase on 2 mg of MWCNTs for 60 min of contact time.

| pH | Relative recovered activity (%) | Immobilization yield (%) |
|----|---------------------------------|--------------------------|
| 5  | 26.7 ± 0.5                      | 99 ± 2                   |
| 6  | 19.7 ± 0.4                      | 100 ± 2                  |
| 7  | 32.6 ± 0.7                      | 100 ± 2                  |
| 8  | 35.5 ± 0.7                      | 94 ± 2                   |

**Table S2.** Effect of contact time on immobilization yield and relative recovered activity obtained with the immobilization of  $8.6 \times 10^{-5}$  g.mL<sup>-1</sup> of ASNase on 2 mg of MWCNTs at pH 8.

| Contact time (min) | Relative recovered activity (%) | Immobilization yield (%) |
|--------------------|---------------------------------|--------------------------|
| 15                 | 69 ± 1                          | 74 ± 2                   |
| 45                 | 51 ± 1                          | 90 ± 2                   |
| 60                 | 36 ± 1                          | 94 ± 2                   |
| 90                 | 15.4 ± 0.3                      | 100 ± 2                  |
| 120                | 20.8 ± 0.4                      | 100 ± 1                  |

**Table S3.** Effect of enzyme concentration on immobilization yield and relative recovered activity obtained during the immobilization of ASNase on 2 mg of MWCNTs at pH 8 for 45 min.

| ASNase concentration<br>( $\times 10^{-3}$ g.mL $^{-1}$ ) | Relative recovered activity (%) | Immobilization yield (%) |
|-----------------------------------------------------------|---------------------------------|--------------------------|
| 0.040                                                     | 11 $\pm$ 2                      | 98.6 $\pm$ 0.3           |
| 0.086                                                     | 35 $\pm$ 1                      | 97 $\pm$ 1               |
| 0.160                                                     | 72.4 $\pm$ 0.3                  | 97 $\pm$ 4               |
| 0.320                                                     | 80 $\pm$ 1                      | 99.0 $\pm$ 0.1           |
| 1.500                                                     | 90.9 $\pm$ 0.4                  | 90 $\pm$ 10              |
| 3.000                                                     | 90 $\pm$ 5                      | 90 $\pm$ 5               |

**Table S4.** Amount of adsorbed active ASNase (U) per gram of MWCNT (U.g $^{-1}$ ) for the immobilization of different concentrations of ASNase on 2 mg of MWCNTs at pH 8 during 45 min, used for the prediction of Langmuir and Freundlich isotherm models.

| ASNase concentration<br>( $\times 10^{-3}$ g.mL $^{-1}$ ) | <i>q</i><br>(U.g $^{-1}$ ) |
|-----------------------------------------------------------|----------------------------|
| 0.040                                                     | 5.89                       |
| 0.086                                                     | 42.81                      |
| 0.160                                                     | 96.19                      |
| 0.320                                                     | 123.74                     |
| 1.500                                                     | 133.40                     |
| 3.000                                                     | 131.15                     |
